# Supplementary material
Source: publisher site journal article supplement (http://www.degruyter.com/publication/journal_key/GPS/downloadAsset/GPS_SI%20CfP%20Green%20nanomaterials%20in%20waste%20management.pdf)
Supplement: Supplementary file 1 [file GPS_SI%20CfP%20Green%20nanomaterials%20in%20waste%20management.pdf]

# Special Issue in Green Processing and Synthesis: EMERGING GREEN NANOMATERIALS FOR SUSTAINABLE WASTE MANAGEMENT AND BIOMEDICAL APPLICATIONS

## GUEST EDITORS

**Prof. Palanivel Velmurugan**, Centre for Materials Engineering and Regenerative Medicine, Bharath Institute of Higher Education and Research (BIHER), Chennai, India

**Prof. V. Mohanavel**, Centre for Materials Engineering and Regenerative Medicine, Bharath Institute of Higher Education and Research (BIHER), Chennai, India

**Dr. Mahadeo Mahadik**, Division of Biotechnology, Safety, Environment and Life Science Institute, Jeonbuk National University, Iksan, Republic of Korea

## DESCRIPTION

The most inventive and adaptable scientific field of the 21st century is nanotechnology. Nanotechnology has applications in fields as diverse as electronics, modern manufacturing, and medicine. It also has the capability and vision to profoundly alter contemporary lifestyles, society, and even global economies. Still, the majority of the materials and techniques used in this technology at the moment rely on non-renewable resources and create toxic waste. The future of nanoscience and nanotechnology applications can be decided by techniques of green chemistry and green technology. Most of the green nanomaterials are now routinely employed from the laboratory to the commercial scale, but they are also confronting significant obstacles. Natural materials to nanomaterials and the design of naturally benign synthetic techniques have been extensively researched. Researchers have been concentrating on the advancements and difficulties associated with using green nanomaterials in recent decades. The most essential requirements of modern society are for green chemistry, green nanotechnology, and green engineering. In the coming decades, this thoroughly investigated work will undoubtedly open new knowledge vistas in the fields of green nanomaterials, nanoscience, nanotechnology, and green chemistry. Proposed topics for this Special Issue are listed below.

## KEY TOPICS

- ▶ Synthesis of green nanomaterials for waste management applications
- ▶ Green nanotechnology for sustainable development
- ▶ Functionalized nanomaterials and its applications
- ▶ Green nanomaterials for energy and environmental applications
- ▶ Nanocatalysis, nanoadsorbant, nanofiltration, and nanocomposites applications
- ▶ Advanced nanotechnology in biomedical applications
- ▶ Development of nanomaterials for eco-friendly application

## HOW TO SUBMIT

---

Before submission authors should carefully read the [Instruction for Authors](#). In order to make the preparation of manuscript easier, you are advised to use the [Manuscript Template](#).

All submissions to the Special Issue must be made electronically via the [ScholarOne submission system](#).

All manuscripts will undergo the standard peer-review process (single-blind, at least two independent reviewers). When entering your submission via online submission system please choose **“Special Issue: Green nanomaterials in waste management”**.

Submission of a manuscript implies that the work described has not been published before and it is not under consideration for publication anywhere else.

The deadline for submissions is **January 31st, 2024**, but individual papers will be reviewed and published online on an ongoing basis.

Contributors to the Special Issue will benefit from:

- ▶ **indexation in Web of Science, SCOPUS, SCImago (SJR), and many other services**
- ▶ quick and constructive peer review provided by experts in the field
- ▶ no space constraints
- ▶ convenient, web-based paper submission and tracking system – ScholarOne
- ▶ quick online publication upon completing the publishing process (**continuous publication model**)
- ▶ better visibility due to **Open Access**
- ▶ **long-term preservation** of the content (articles archived in Portico)
- ▶ extensive post-publication promotion for selected papers

We are looking forward to receive your submission!

In case of any questions please contact the Managing Editor of Green Processing and Synthesis (Dr. Krzysztof Dębniak, [gps.editorial@degruyter.com](mailto:gps.editorial@degruyter.com)).
